# Supplementary material
Source: Springer Nature journal article supplement (https://www.springermedizin.de/resource/supplementary/12943_2014_1391_MOESM13_ESM.pdf/9552854)

**+**   **B**   **B**   **B**   **B**   **B**   **B**   **C**   **C**   **C**   **C**   **C**   **C**   **inverse**

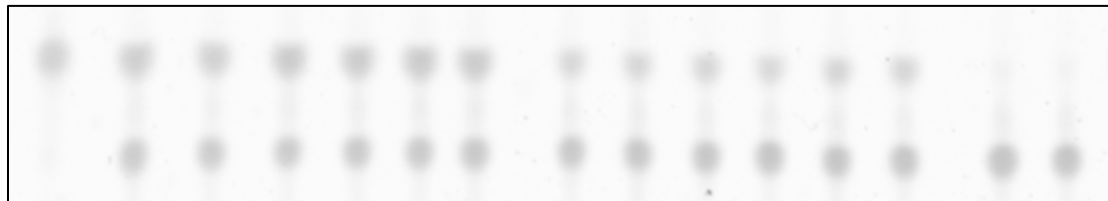

← **Acetyl-CA**

← **CA**

**a**

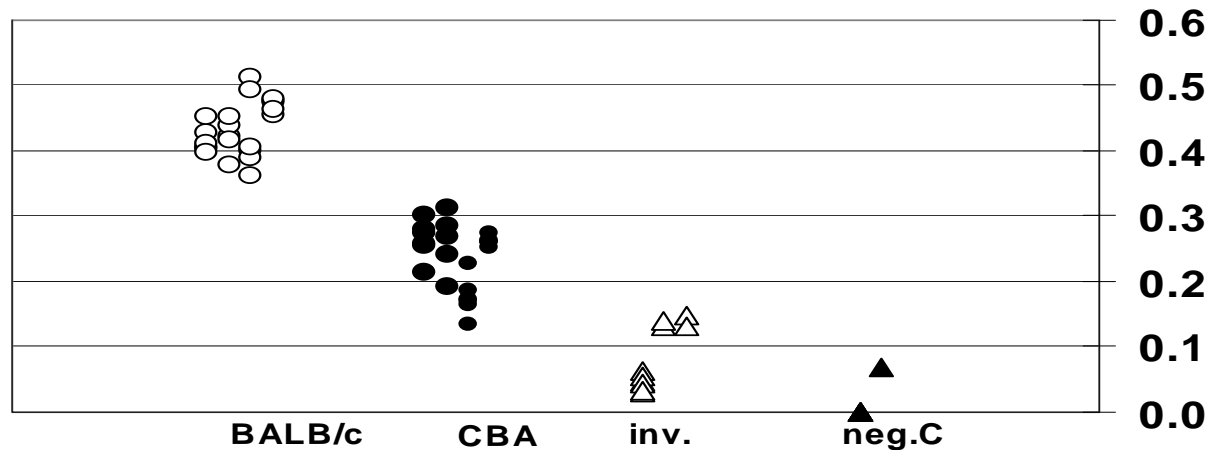

**b**

Supplement: MOESM13 [file 9552854]
